# Supplementary material for: Corneal Cross-Linking for Paediatric Keratoconus: A Systematic Review and Meta-Analysis
Source: MDPI journal article supplement (doi:10.3390/jcm10122626), 2021-06-15
Supplement: s1 [file s1]

**Supplementary Materials S1.** Search strategy for PACK-CXL in MEDLINE.

1. Cross-link\*.mp
2. Crosslink\*.mp
3. CXL.mp
4. KXL.mp
5. Cross-Linking Reagents/
6. Riboflavin\*.mp
7. Vitamin B.mp
8. Photosensiti\*.mp
9. Paediatric.mp
10. Keratoconus\*.mp
11. Corneal ectasia\*.mp
12. Adolescence.mp
13. Kids.mp
14. 1 or 2 or 3 or 4 or 5 or 6 or 7 or 8
15. 9 or 10 or 11 or 12 or 13
16. 14 and 15
17. Limit 16 to humans

### Supplementary Materials S2. Risk of Bias Table in Systematic Review.

[illegible]

|             |      |  |  |  |  |  |  |  |  |  |
|-------------|------|--|--|--|--|--|--|--|--|--|
| Wise        | 2016 |  |  |  |  |  |  |  |  |  |
| Magli       | 2016 |  |  |  |  |  |  |  |  |  |
| Uçakhan     | 2016 |  |  |  |  |  |  |  |  |  |
| Badawi      | 2017 |  |  |  |  |  |  |  |  |  |
| Henriquez   | 2017 |  |  |  |  |  |  |  |  |  |
| Padmanabhan | 2017 |  |  |  |  |  |  |  |  |  |
| Knutsson    | 2018 |  |  |  |  |  |  |  |  |  |
| Mazzotta    | 2018 |  |  |  |  |  |  |  |  |  |
| Iqbal       | 2019 |  |  |  |  |  |  |  |  |  |
| Eissa       | 2019 |  |  |  |  |  |  |  |  |  |

Low risk

High risk

Unclear

Not applicable
